# Supplementary material for: Heavy Metals Enrichment Associated with Water-Level Fluctuations in the Riparian Soils of the Xiaowan Reservoir, Lancang River
Source: MDPI journal article supplement (doi:10.3390/ijerph191912902), 2022-10-08
Supplement: s1 [file s1]

## Supplementary Materials

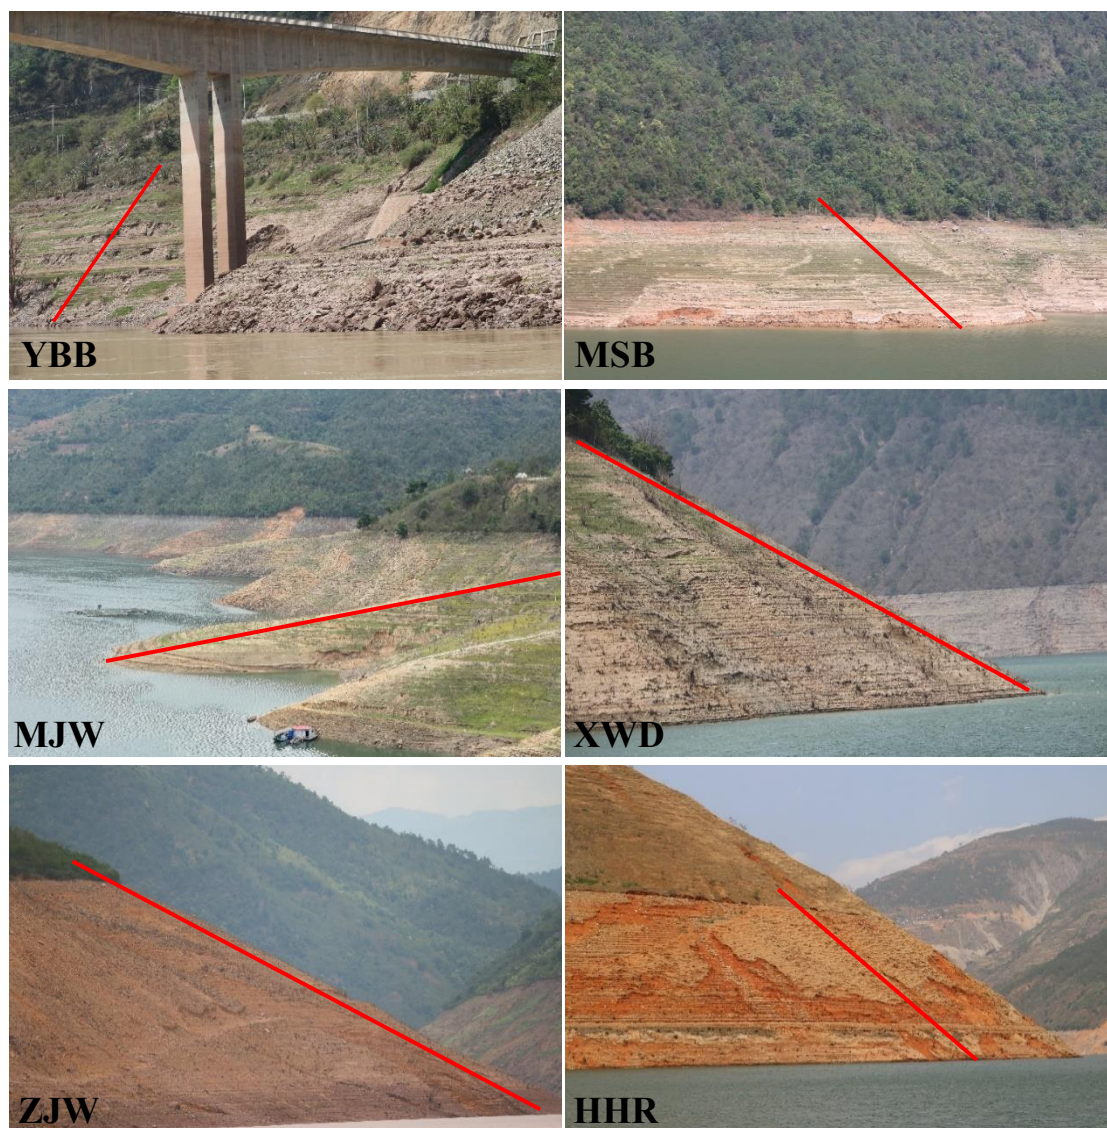

**Figure S1.** The riparian soils sampling locations of Xiaowan Reservoir

**Table S1.** The statistics of the heavy metal concentrations in the riparian soils of XWR.

| Element (mg/kg)                | As                              | Cd                       | Cr                               | Cu                              | Hg                             | Ni                               | Pb                              | Zn                               |
|--------------------------------|---------------------------------|--------------------------|----------------------------------|---------------------------------|--------------------------------|----------------------------------|---------------------------------|----------------------------------|
| <b>(a) YBB (<i>n</i> = 6)</b>  |                                 |                          |                                  |                                 |                                |                                  |                                 |                                  |
| Maximum                        | 8.30                            | 0.09                     | 71.00                            | 49.40                           | 0.03                           | 45.90                            | 14.70                           | 62.00                            |
| Minimum                        | 2.00                            | 0.05                     | 57.00                            | 39.20                           | 0.01                           | 37.80                            | 8.90                            | 36.00                            |
| Mean*                          | 5.08 ± 0.81 <sup>c</sup>        | 0.07 ± 0.00 <sup>a</sup> | <b>67.00 ± 1.89<sup>ac</sup></b> | <b>43.72 ± 1.39<sup>a</sup></b> | 0.02 ± 0.00 <sup>b</sup>       | <b>42.08 ± 1.10<sup>ab</sup></b> | 11.57 ± 0.85 <sup>f</sup>       | 51.00 ± 3.38 <sup>e</sup>        |
| Std. D                         | 1.98                            | 0.01                     | 4.62                             | 3.42                            | 0.01                           | 2.68                             | 2.07                            | 8.29                             |
| <b>IRZ</b>                     | 6.6                             | 0.054                    | 57                               | 39.2                            | 0.03                           | 44.5                             | 12.7                            | 49                               |
| <b>(b) MSB (<i>n</i> = 10)</b> |                                 |                          |                                  |                                 |                                |                                  |                                 |                                  |
| Maximum                        | 3.20                            | 0.14                     | 41.00                            | 16.00                           | 0.03                           | 13.70                            | 23.80                           | 98.00                            |
| Minimum                        | 1.70                            | 0.07                     | 29.00                            | 9.50                            | 0.01                           | 7.90                             | 20.90                           | 67.00                            |
| Mean*                          | 2.53 ± 0.15 <sup>cf</sup>       | 0.10 ± 0.00 <sup>f</sup> | 33.50 ± 1.13 <sup>e</sup>        | 12.71 ± 0.66 <sup>bc</sup>      | 0.02 ± 0.00 <sup>b</sup>       | 10.70 ± 0.49 <sup>f</sup>        | 22.09 ± 0.27 <sup>bc</sup>      | <b>81.60 ± 3.24<sup>ab</sup></b> |
| Std. D                         | 0.48                            | 0.02                     | 3.58                             | 2.10                            | 0.01                           | 1.55                             | 0.86                            | 10.24                            |
| <b>IRZ</b>                     | 2.8                             | 0.07                     | 32                               | 10.3                            | 0.02                           | 11.5                             | 21.8                            | 69                               |
| <b>(c) MJW (<i>n</i> = 14)</b> |                                 |                          |                                  |                                 |                                |                                  |                                 |                                  |
| Maximum                        | 29.40                           | 0.07                     | 91.50                            | 28.70                           | 0.05                           | 40.10                            | 56.70                           | 116.50                           |
| Minimum                        | 6.10                            | 0.02                     | 37.00                            | 8.10                            | 0.01                           | 17.60                            | 32.10                           | 48.00                            |
| Mean*                          | <b>12.69 ± 1.75<sup>b</sup></b> | 0.03 ± 0.00 <sup>e</sup> | <b>69.79 ± 4.85<sup>ab</sup></b> | 15.44 ± 1.48 <sup>bd</sup>      | 0.02 ± 0.00 <sup>b</sup>       | 30.66 ± 1.97 <sup>cd</sup>       | <b>39.43 ± 1.49<sup>a</sup></b> | 72.14 ± 4.82 <sup>ad</sup>       |
| Std. D                         | 6.55                            | 0.01                     | 18.17                            | 5.53                            | 0.01                           | 7.36                             | 5.59                            | 18.04                            |
| <b>IRZ</b>                     | 17.7                            | 0.07                     | 82                               | 22.4                            | 0.02                           | 38                               | 39.1                            | 97                               |
| <b>(d) XWD (<i>n</i> = 14)</b> |                                 |                          |                                  |                                 |                                |                                  |                                 |                                  |
| Maximum                        | 3.80                            | 0.08                     | 66.00                            | 9.60                            | 0.03                           | 31.50                            | 9.60                            | 40.00                            |
| Minimum                        | 1.70                            | 0.02                     | 48.00                            | 2.40                            | 0.01                           | 17.30                            | 7.00                            | 19.00                            |
| Mean <sup>a</sup>              | 2.46 ± 0.15 <sup>ce</sup>       | 0.04 ± 0.00 <sup>a</sup> | 55.79 ± 1.12 <sup>cd</sup>       | 4.83 ± 0.51 <sup>f</sup>        | 0.02 ± 0.00 <sup>b</sup>       | 23.61 ± 0.85 <sup>e</sup>        | 8.06 ± 0.19                     | 25.07 ± 1.65 <sup>f</sup>        |
| Std. D                         | 0.55                            | 0.02                     | 4.19                             | 1.90                            | 0.01                           | 3.19                             | 0.72                            | 6.16                             |
| <b>IRZ</b>                     | 2.7                             | 0.03                     | 48                               | 9.6                             | 0.01                           | 17.3                             | 7.3                             | 27                               |
| <b>(e) ZJW (<i>n</i> = 14)</b> |                                 |                          |                                  |                                 |                                |                                  |                                 |                                  |
| Maximum                        | 58.50                           | 0.25                     | 73.00                            | 22.20                           | 0.30                           | 37.40                            | 34.40                           | 134.00                           |
| Minimum                        | 37.10                           | 0.02                     | 48.00                            | 15.40                           | 0.05                           | 24.80                            | 17.10                           | 50.00                            |
| Mean*                          | <b>49.21 ± 1.50<sup>a</sup></b> | 0.06 ± 0.01 <sup>a</sup> | 56.07 ± 1.75 <sup>c</sup>        | 18.66 ± 0.56 <sup>bc</sup>      | <b>0.13 ± 0.02<sup>a</sup></b> | 30.81 ± 0.95 <sup>c</sup>        | 23.01 ± 1.11 <sup>b</sup>       | 74.36 ± 5.85 <sup>ac</sup>       |
| Std. D                         | 5.61                            | 0.06                     | 6.54                             | 2.10                            | 0.09                           | 3.54                             | 4.17                            | 21.89                            |
| <b>IRZ</b>                     | 37.1                            | 0.02                     | 56                               | 18.6                            | 0.06                           | 25.8                             | 17.6                            | 52                               |
| <b>(f) HHR (<i>n</i> = 14)</b> |                                 |                          |                                  |                                 |                                |                                  |                                 |                                  |
| Maximum                        | 4.80                            | 0.09                     | 96.00                            | 30.30                           | 0.03                           | 55.40                            | 27.40                           | 100.00                           |
| Minimum                        | 2.90                            | 0.02                     | 74.00                            | 16.20                           | 0.02                           | 33.60                            | 17.60                           | 74.00                            |
| Mean*                          | 3.69 ± 0.17 <sup>cd</sup>       | 0.05 ± 0.01 <sup>a</sup> | <b>89.57 ± 1.34<sup>a</sup></b>  | 23.57 ± 1.21 <sup>b</sup>       | 0.02 ± 0.00 <sup>b</sup>       | <b>44.84 ± 1.41<sup>a</sup></b>  | 20.81 ± 0.65 <sup>bd</sup>      | <b>86.79 ± 2.44<sup>a</sup></b>  |
| Std. D                         | 0.63                            | 0.02                     | 5.02                             | 4.52                            | 0.00                           | 5.27                             | 2.44                            | 9.13                             |
| <b>IRZ</b>                     | 3.516.96                        | 0.0541.92                | 945.61                           | 30.319.16                       | 0.0216.33                      | 47.811.74                        | 27.411.72                       | 10010.52                         |

\* Represented as a mean ± standard error. Data in the bold text indicates the exceeded the background value of Yunnan Province. Small letters in the upper right of “Mean\*” value represent the significant difference of trace metals concertation along different sampling sections
